# Supplementary material for: Towards mechanically robust cellulose fiber-reinforced polypropylene composites with strong interfacial interaction through dual modification
Source: Royal Society of Chemistry journal article supplement (doi:10.1039/c5ra01792k), 2015-01-01
Supplement: c5ra01792k1.pdf [file c5ra01792k1.pdf]

# Supporting Information

## **Towards mechanically robust cellulose fiber-reinforced polypropylene composites with strong interfacial interaction through dual modification**

*Shuman Wang, Yifeng Lin, Xinxing Zhang\* and Canhui Lu\**

State Key Laboratory of Polymer Materials Engineering, Polymer Research Institute  
of Sichuan University, Chengdu 610065, China

---

\*Corresponding author: Xinxing Zhang and Canhui Lu  
E-mail address: [xxzwwh@126.com](mailto:xxzwwh@126.com) and [canhuilu@scu.edu.cn](mailto:canhuilu@scu.edu.cn)  
Tel: +86-28-85460607 Fax: +86-28-85402465

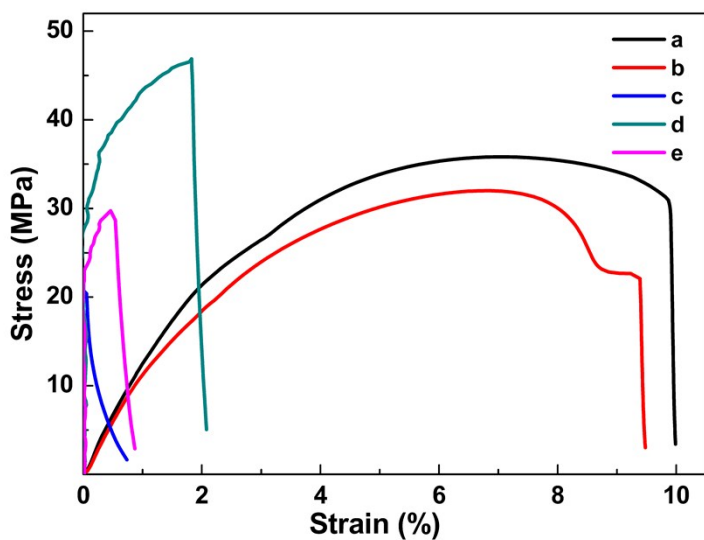

Fig. S1. Comparison of typical stress-strain curves for neat PP (a), modified PP (b), neat PP/TBCF (c), modified PP/TBCF (d) and modified PP/BCF (e) composites with 50 wt% cellulose

Typical stress-strain curves were given in Fig. S1 to investigate the influence of modification on the mechanical properties of composites. The tensile strength of the neat PP is a little higher than that of the modified PP due to the mechanochemical grafting causing some degree of chain scission. Composites reinforced with 50 wt% cellulose fiber shows a higher Young's modulus than neat PP, indicating the reinforcement effect of these fillers. The tensile strength of modified PP/TBCF (50/50 wt%) composites prepared through dual modification was remarkably improved compared to those of neat PP, neat PP/TBCF composites and modified PP/BCF composites, enhanced by about 29.3%, 112.4% and 53.8%, respectively. While the tensile strength of neat PP/TBCF and modified PP/BCF composites dropped below that of neat PP. These results illustrated that the combination of mechanochemical

modification of PP and TEMPO-mediated oxidation of BCF showed a synergistic effect on the tensile strength of the prepared composites, particularly at higher fiber loading. In addition, the elongation at break of cellulose fiber-reinforced PP composites is lower than that of the neat PP, which is common for natural fiber-reinforced polymeric composites.
